# Nationwide SARS-CoV-2 Surveillance Study for Sewage and Sludges of Wastewater Treatment Plants in Turkey

Bilge Alpaslan Kocamemi<sup>a\*</sup>, Halil Kurt<sup>b</sup>, Ahmet Sait<sup>c</sup>, Hamza Kadi<sup>d</sup>, Fahriye Sarac<sup>e</sup>, Ismail Aydın<sup>d</sup>, Ahmet Mete Saatci<sup>e</sup>, Bekir Pakdemirli<sup>f</sup>

## Affiliations

<sup>a</sup> Marmara University, Department of Environmental Engineering, Istanbul, Turkey

<sup>b</sup> Saglik Bilimleri University, Hamidiye International School of Medicine, Department of Medical Biology, Istanbul, Turkey

<sup>c</sup> Ministry of Agriculture and Forestry, Republic of Turkey, Veterinary Control Central Research Institute, Pendik, Istanbul, Turkey.

<sup>d</sup> Ministry of Agriculture and Forestry, Republic of Turkey, Veterinary Control Central Research Institute, Samsun, Turkey.

<sup>e</sup> Turkish Water Institute, Istanbul, Turkey

<sup>f</sup> Ministry of Agriculture and Forestry, Republic of Turkey, Ankara, Turkey

## Corresponding author

bilge.alpaslan@marmara.edu.tr

**Bilge Alpaslan Kocamemi:** Methodology, Data Curation, Formal analysis, Writing - Original Draft, Preparation, Writing - Review & Editing, Visualization, Supervision, Project administration. **Halil Kurt:** Validation, Verification, Data Curation, Writing - Review & Editing. **Ahmet Sait, Hamza Kadi:** Investigation, **Fahriye Sarac, Ismail Aydın:** Validation, **Ahmet Mete Saatci** : Conceptualization, Writing - Review & Editing, Supervision, Project administration. **Bekir Pakdemirli:** Resources, Funding acquisition

## 1. Abstract

Since the announcement of the pandemic of Covid-19 by WHO on March 11, 2020, the countries have started to monitor surveillance of SARS-CoV-2 through medical tests. However, people with no and very light symptoms are usually not medically tested or never hospitalized and they are missed. In the study of Wu et al. [1], it was realized that the urine and faeces of all infected people contain SARS-CoV-2. After that, sewage, and sludge-based SARS-CoV-2 surveillance studies have gained significant importance around the world (Fig.1). SARS-CoV-2 was detected in wastewaters in The Netherlands [2,3,4], USA [1,5,6,7, 8, 9, 10], Australia [11], France [12, 13, 14], China [15], Spain [16,17,18,19,20], Italy [21, 22,23], Israel [24], Turkey[25], Germany[26], Japan [27,28], India [29,30],

NOTE: This preprint reports new research that has not been certified by peer review and should not be used to guide clinical practice.

Pakistan [31], Brazil [32,33], Chile [34], Denmark, France, Belgium[35], Equator [36] and Sweden [37] using different virus concentration techniques. Published data show that high concentrations of the SARS-CoV-2 RNA reaches to wastewater treatment plants (WWTPs). On 7<sup>th</sup> of May 2020, Turkey took its place among a few country which have been started wastewater based surveillance studies at the early stages of pandemic by reporting SARS-CoV-2 RT-qPCR levels of major WWTPs of Istanbul [25]. Turkey [38] first detected SARS-CoV-2 in both primary and waste activated sludges of Istanbul WWTPs. Later, USA [39] and Spain [40] were also studied on sludge samples. There are also studies evaluating the SARS-CoV-2 in WWTPs effluents [10,13,14, 28, 29,30, 34, 36].

This study aimed to scan distribution of Covid-19 through Turkey by SARS-CoV-2 measurements in influent, effluent and sludge samples of WWTPs. The influent, effluent and sludge samples were collected from main WWTPs located in 81 cities of Turkey through May 2020- July 2020. Among those 81 cities, Istanbul metropole with 15.5 million inhabitants was chosen as the pilot city since 65% of all cases in Turkey were present here. Hence, all treatment plants in Istanbul were scanned through the study. The viral activity tests were also conducted for the influent, effluent and sludge samples resulting high qPCR.

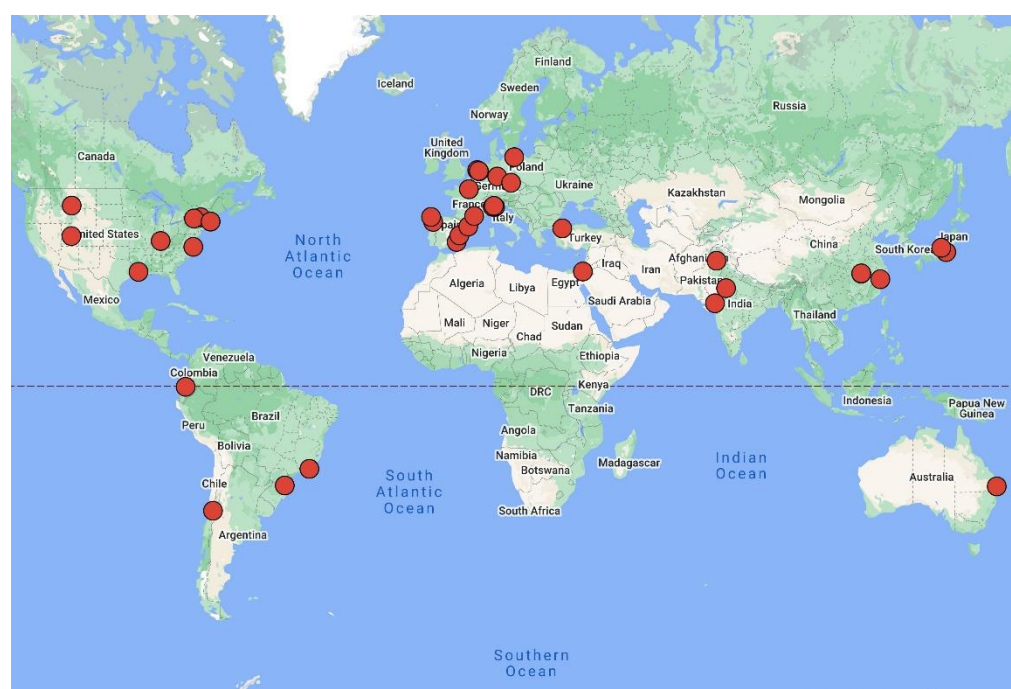

**Fig 1.** Worldwide SARS-CoV-2 surveillance studies in wastewater (<https://www.google.com/maps/>)

**Keywords:** Covid-19, primary sludge, polyethylene glycol, RT-qPCR, SARS-CoV-2, virus concentration, wastewater, waste activated sludge.

## 2. Value of the Data

- The dataset demonstrates a nationwide SARS-CoV-2 surveillance study which is unique worldwide. It is the first demonstration of evaluating Covid-19 distribution in a whole country of 83 million through a SARS-CoV-2 surveillance study performed in wastewater.
- The dataset provides information about fate of SARS-CoV-2 in wastewater treatment plants by demonstrating SARS-CoV-2 levels in influent, effluent, primary sludge and waste activated sludge samples.
- The dataset provides information about the possible activity of SARS-CoV-2 in various parts of wastewater treatment plants, as a first survey in the world

## 3. Methodology

### 3.1. Sampling

In Turkey, there are 3 major types of wastewater treatment plants. Type 1, called as preliminary treatment plants include physical treatment units, screens and grit chambers. Type 2, called as activated sludge plants include physical treatment units and biological organic carbon removal and nitrification units. Type 3, called as advanced wastewater treatment plants include physical treatment units and biological carbon, nitrogen and phosphorus removal facilities. There also a few cities not including any treatment facility for domestic wastewater. Some of the Type 2 and type 3 plants do not have primary sedimentation. Thus, since there is no primary sludge, there are no anaerobic digesters and the waste activated sludge (which is mostly bacteria) is stabilized by extended aeration.

In May 2020- June 2020, influent, effluent, primary and waste activated sludge samples were collected from 189 WWTPs of 81 cities of Turkey (Figure 2). Totally, 177 influent, 167 effluent, 35 primary sludge and 122 waste activated sludge samples were collected. In megacity Istanbul where about 65% cases were recorded, the samples were collected from 25 treatment plants (7 preliminary treatment plants, 9 activated sludge plants, 9 advanced activated sludge plants) in order to observe the areal distribution of the cases. For the other cities, treatment plants serving highest population were selected for sampling. In the big cities, more than one treatment plant was selected depending on the population of the city. In few cities not having any wastewater treatment, the samples were collected from the manholes located at center of the city.

The samples collected in 250 ml sterile bottles were transferred under cold chain (less than 4 degrees Celsius) either to Istanbul Pendik or Samsun Veterinary Control Central Research Institute depending on the location of the city.

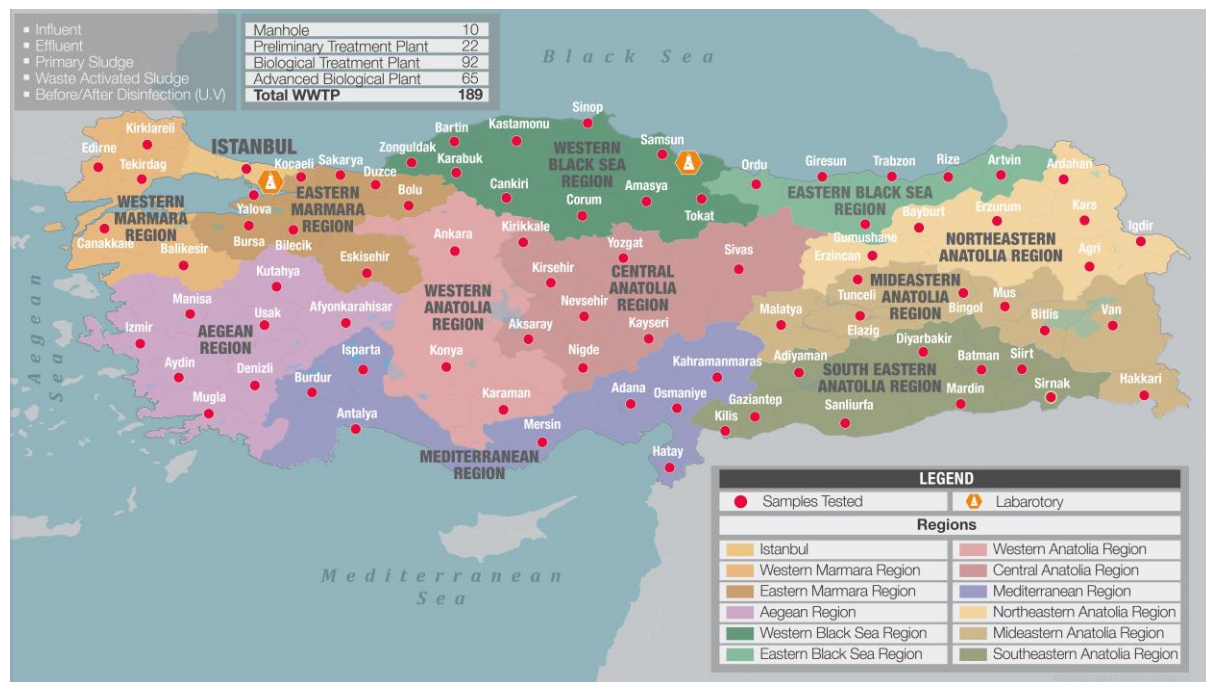

**Fig 2.** Sampling locations of nationwide SARS-CoV-2 surveillance study in wastewater and sludges of Turkey.

### 3.2. SARS-CoV-2 concentration

Samples were shaken at 4°C at 100 rpm for 30 min in order to transfer attached viruses to the aqueous phase. Microorganisms and large particles were removed from the samples by centrifugation at 7471G for 30 minutes at 4°C. 250 ml of supernatant was filtered through 0.45 µm and 0.2 µm to remove remaining particles and cell debris. Filtrate was mixed thoroughly with PEG 8000 (10% w/v) by shaking for 1 minute. The mixture was incubated at 4°C at 100 rpm for overnight. Following to the incubation, the mixture was divided in six 50 ml falcon tubes. Viruses were precipitated by centrifugation at 7471G for 120 minutes at 4°C. Supernatant was removed carefully without disturbing the pellets. Pellets of each falcon tubes were re-suspended with 200 µl RNA free water. 1 ml of virus concentrate was used for total RNA extraction and remaining concentrate stored at -80°C. Total viral RNA was extracted either with Roche MagNA pure LC total nucleic acid isolation kit using Roche MagNA pure LC system in accordance with the manufacturer's protocols (Istanbul Pendik Lab) or manual RNA extraction method (Samsun Lab) . RNA was determined both qualitatively and quantitatively by Thermo NanoDrop 2000c (Penzberg, Germany). Due to high community risk of using SARS-CoV-2 virus, 300 µl of 10<sup>5</sup> copy/ml surrogate avian coronavirus of Infectious Bronchitis Virus were added our samples in order to evaluate the virus recovery efficiency of PEG 8000 adsorption method. Based on RT-QPCR results, 1-1.5 log virus titer loss were observed after PEG 8000 adsorption and RNA isolation.

### 3.3. Quantitative reverse transcription PCR (RT-qPCR)

Primers and taqman probe sets targeting SARS-CoV-2 RdRp gene were used in this study (Corman et al., 2020) to detect and quantify SARS-CoV-2 virus. Serial dilution of synthetic SARS-CoV-2 RdRp gene were used as a standard for absolute quantification. RT-qPCR analysis was performed in Realtime ready RNA virus Master (Roche Diaonostics, Mannheim, Germany) contained 0.8 nM of forward primer and reverse primer, 0.25 nM probe and 5 µL of template RNA. The RT-qPCR assays were performed at 50 °C for 6 min, 53 °C for 4 min, 58 °C for 4 min for reverse transcription, followed by 95 °C for 1 min and then 45 cycles of 95 °C for 10 s, 58 °C for 30 s and 72 °C for 1 s for data collection using a Roche LightCycle 2.0 thermal cycler (Roche Diaonostics, Mannheim, Germany).

### 3.4. SARS-CoV-2 Activity Tests

Samples which viral nucleic acid detected by RT-QPCR were filtered through 200 um filter prior to inoculation. 200 µl of samples were inoculated to Pendik Veterinary Research Control Institute vero cell line into 24-well plates, shaken every 15 minutes and kept at 37 °C for 1 hour, waiting for adsorption. After adsorption, the liquid in the wells was drawn and added to 1000 µl Glasgow Minimum Essential Medium (GMEM) which containing 2% fetal calf serum, 1% antibiotic and L-Glutamine. It was examined in terms of cytopathic effect (CPE) with a microscope for 3 days. The second passages were inoculated on 24-well tissue culture plates in the same order by the adsorption method. 200 µl from the first passage was inoculated into 24 well plates. It was surveyed in terms of CPE again. The third passage was inoculated using same method.

## 4. Data Description

### 4.1. SARS-COV-2 RT-qPCR Results

The SARS-CoV-2 levels (virus titer/L) detected in WWTPs of 81 cities of Turkey are demonstrated due to geographical regions of Marmara (*Istanbul, Fig.3; Eastern Marmara, Fig.4; Western Marmara, Fig.5*), Anatolia (*Western Anatolia and Central Anatolia, Fig.6*), Aegean (*Fig. 7*), Black Sea (*Western and Eastern Black Sea, Fig.8*), Mediterranean (*Fig. 9*), Eastern Anatolia (*Northeastern and Mideastern Anatolia, Fig. 10; Southeastern Anatolia, Fig.11*) regions.

SARS-CoV-2 genome was detected quantitatively in Western Marmara (Istanbul), Eastern Marmara (cities of Bursa and Izmit), Aegean (city of Izmir), Eastern Black Sea (city of Ordu), Mediterranean (city of Antalya) and Central Anatolia ( city of Konya) regions in the range of  $8 \times 10^3$ - $8 \times 10^6$  virus titer/L. These results are summarized on Turkey map shown in Figure 12.

In mega city Istanbul (Fig. 13), SARS-CoV-2 was detected more concentrated in the effluent samples with respect to the influent samples. Moreover, The SARS-CoV-2 detection in the waste activated sludge samples was about 14 % more with respect to the influent samples. These observations might be due to adsorption of SARS-CoV-2 on sludge and release of adsorbed viruses with time as the waste



activated sludge was recycled for days in the treatment plant due to long sludge age in extended aeration systems, common in Istanbul WWTPs.

All throughout the WWTPs in Turkey (Fig.14), no significant differences were observed among influent, effluent and sludge measurements. Titers of SARS-CoV-2 have been detected ranging from  $2.7\text{E}+3$  to  $8.2\text{E}+6$  for the influent samples,  $6.0\text{E}+3$  to  $7.6\text{E}+6$  for the effluent samples,  $1.6\text{E}+4$  to  $1.1\text{E}+6$  for the primary sludge samples and  $2.6\text{E}+2$  to  $2.8\text{E}+6$  for the waste activated sludge samples.

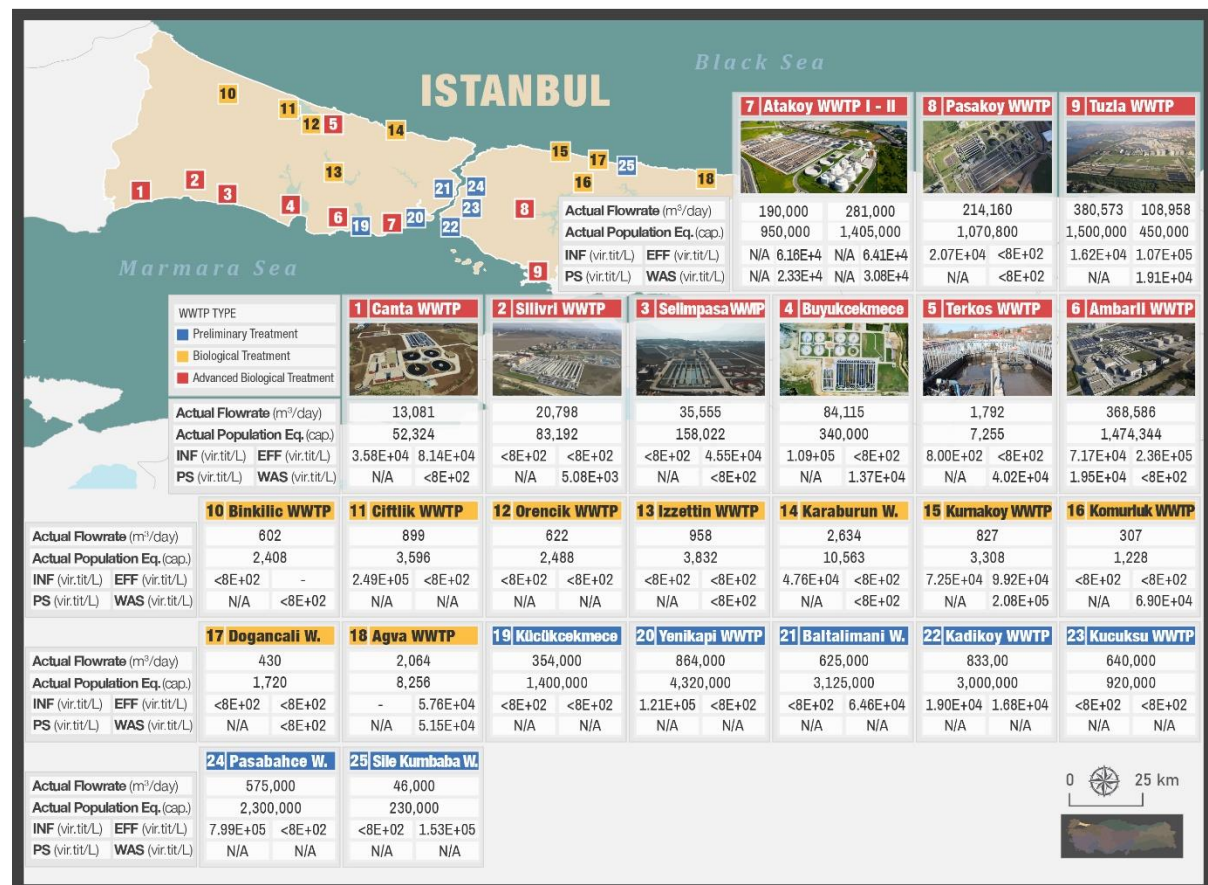

Fig 3. SARS-CoV-2 titers in wastewater and sludges of Istanbul WWTPs

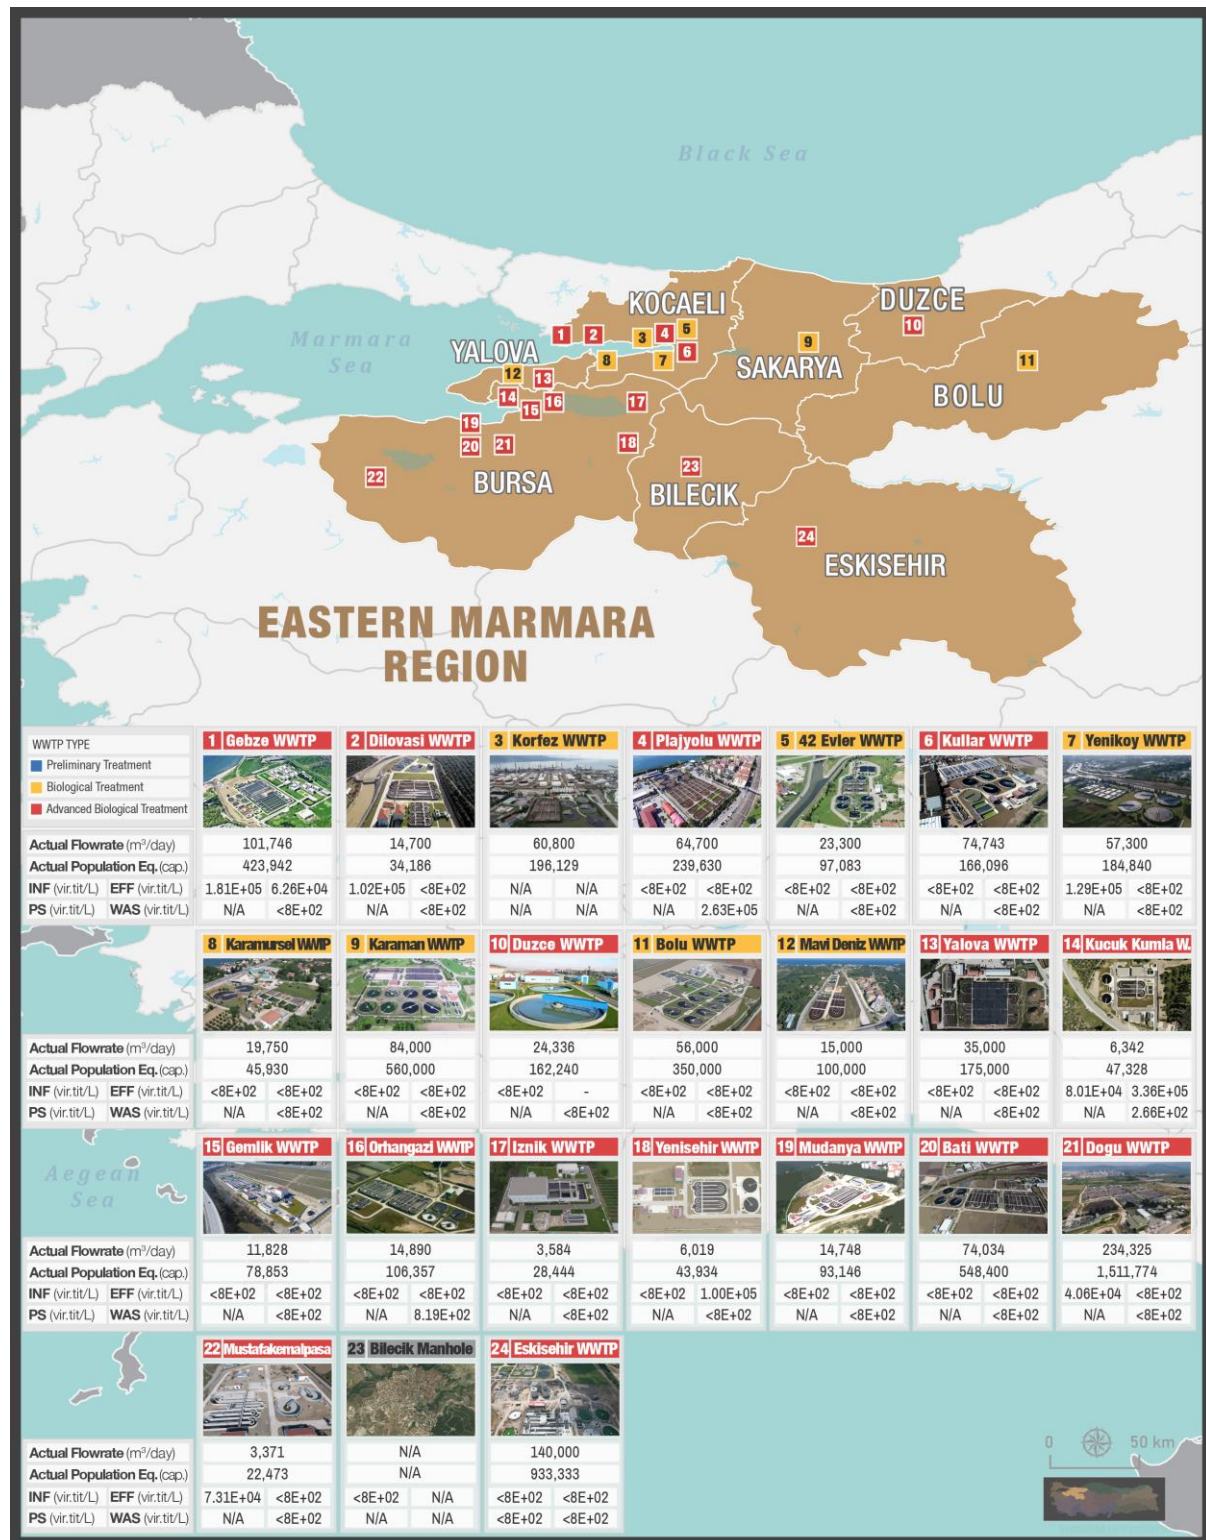

**Fig 4. SARS-CoV-2 titers in wastewater and sludges of cities located in Eastern Marmara region**

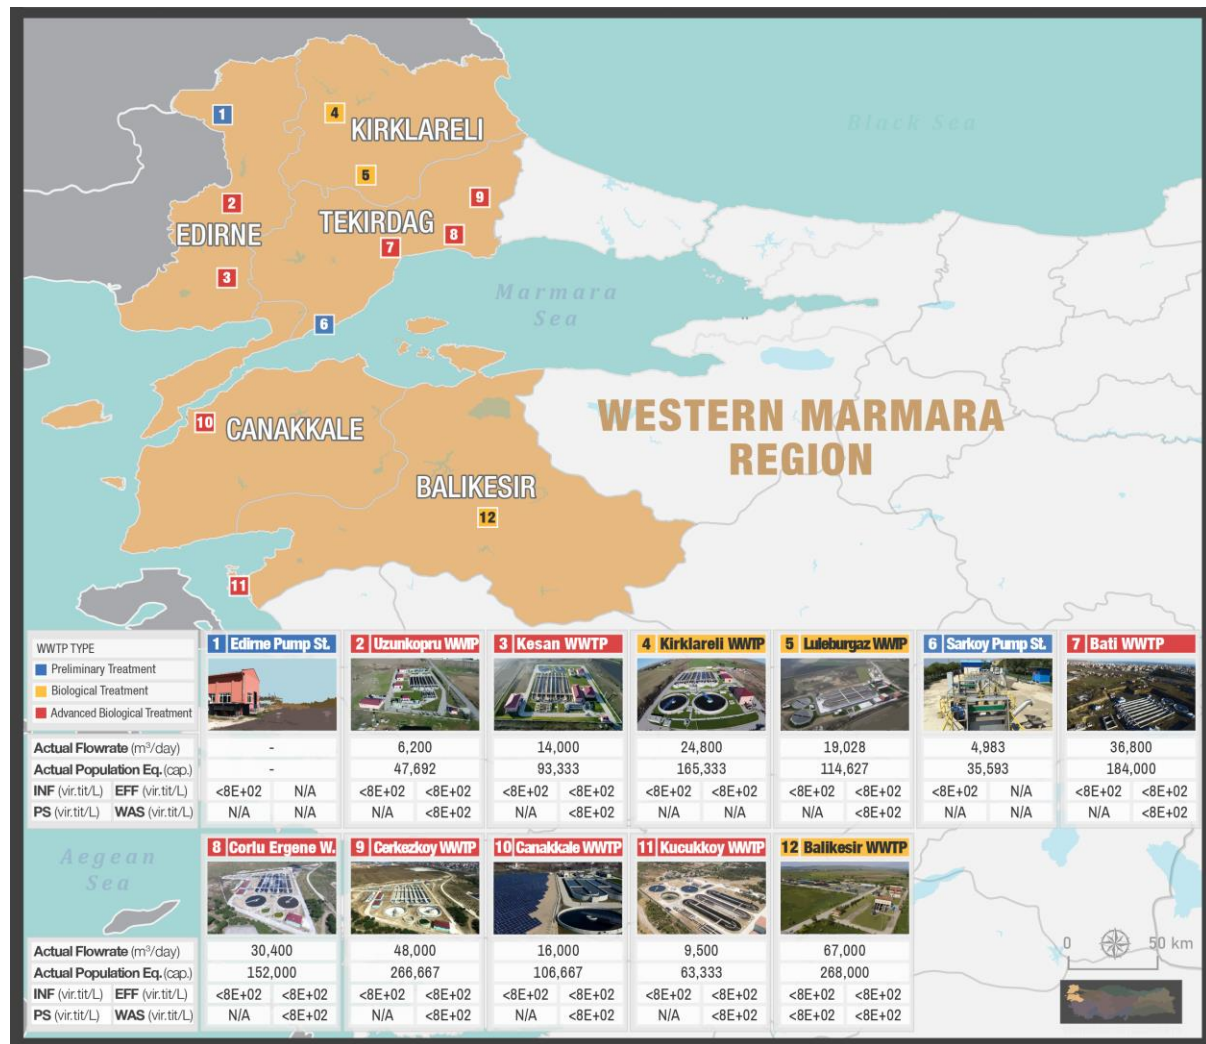

**Fig 5.** SARS-CoV-2 titers in wastewater and sludges of cities located in Western Marmara region



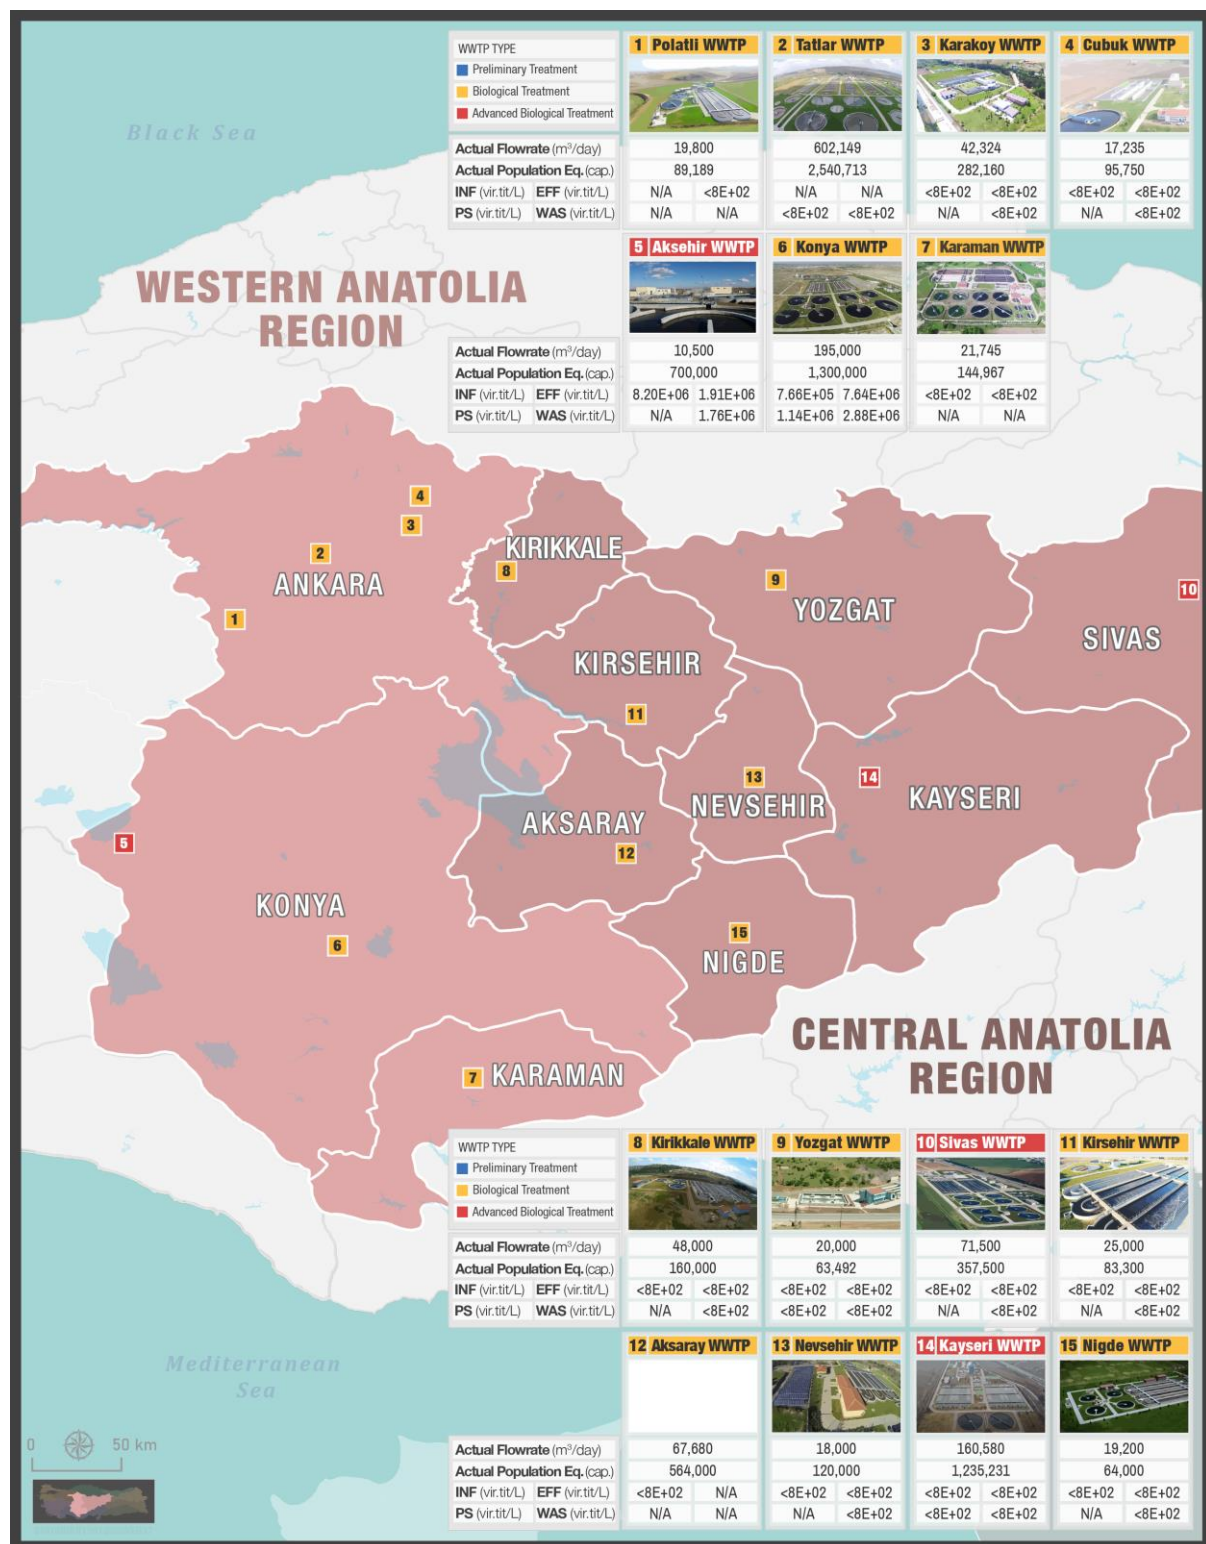

**Fig 6.** SARS-CoV-2 in wastewater and sludges of cities located in Western and Central Anatolia region.

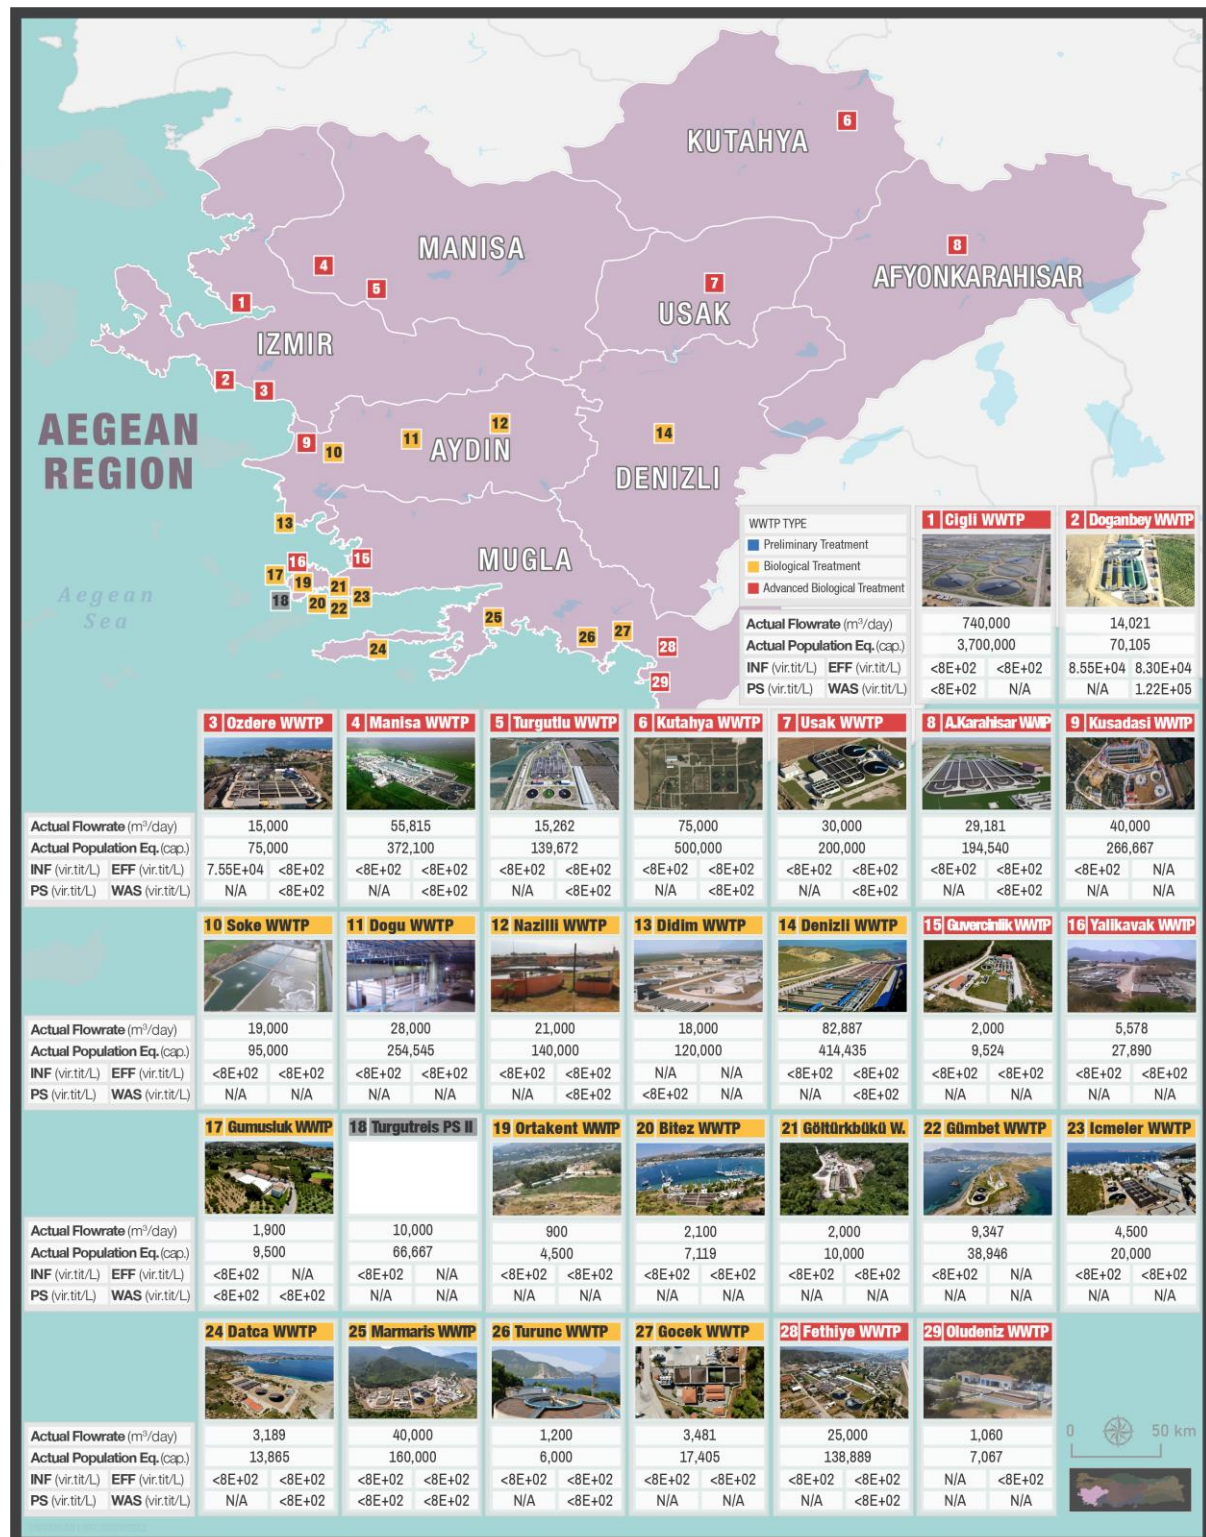

**Fig 7. SARS-CoV-2 in wastewater and sludges of cities located in Aegean region.**



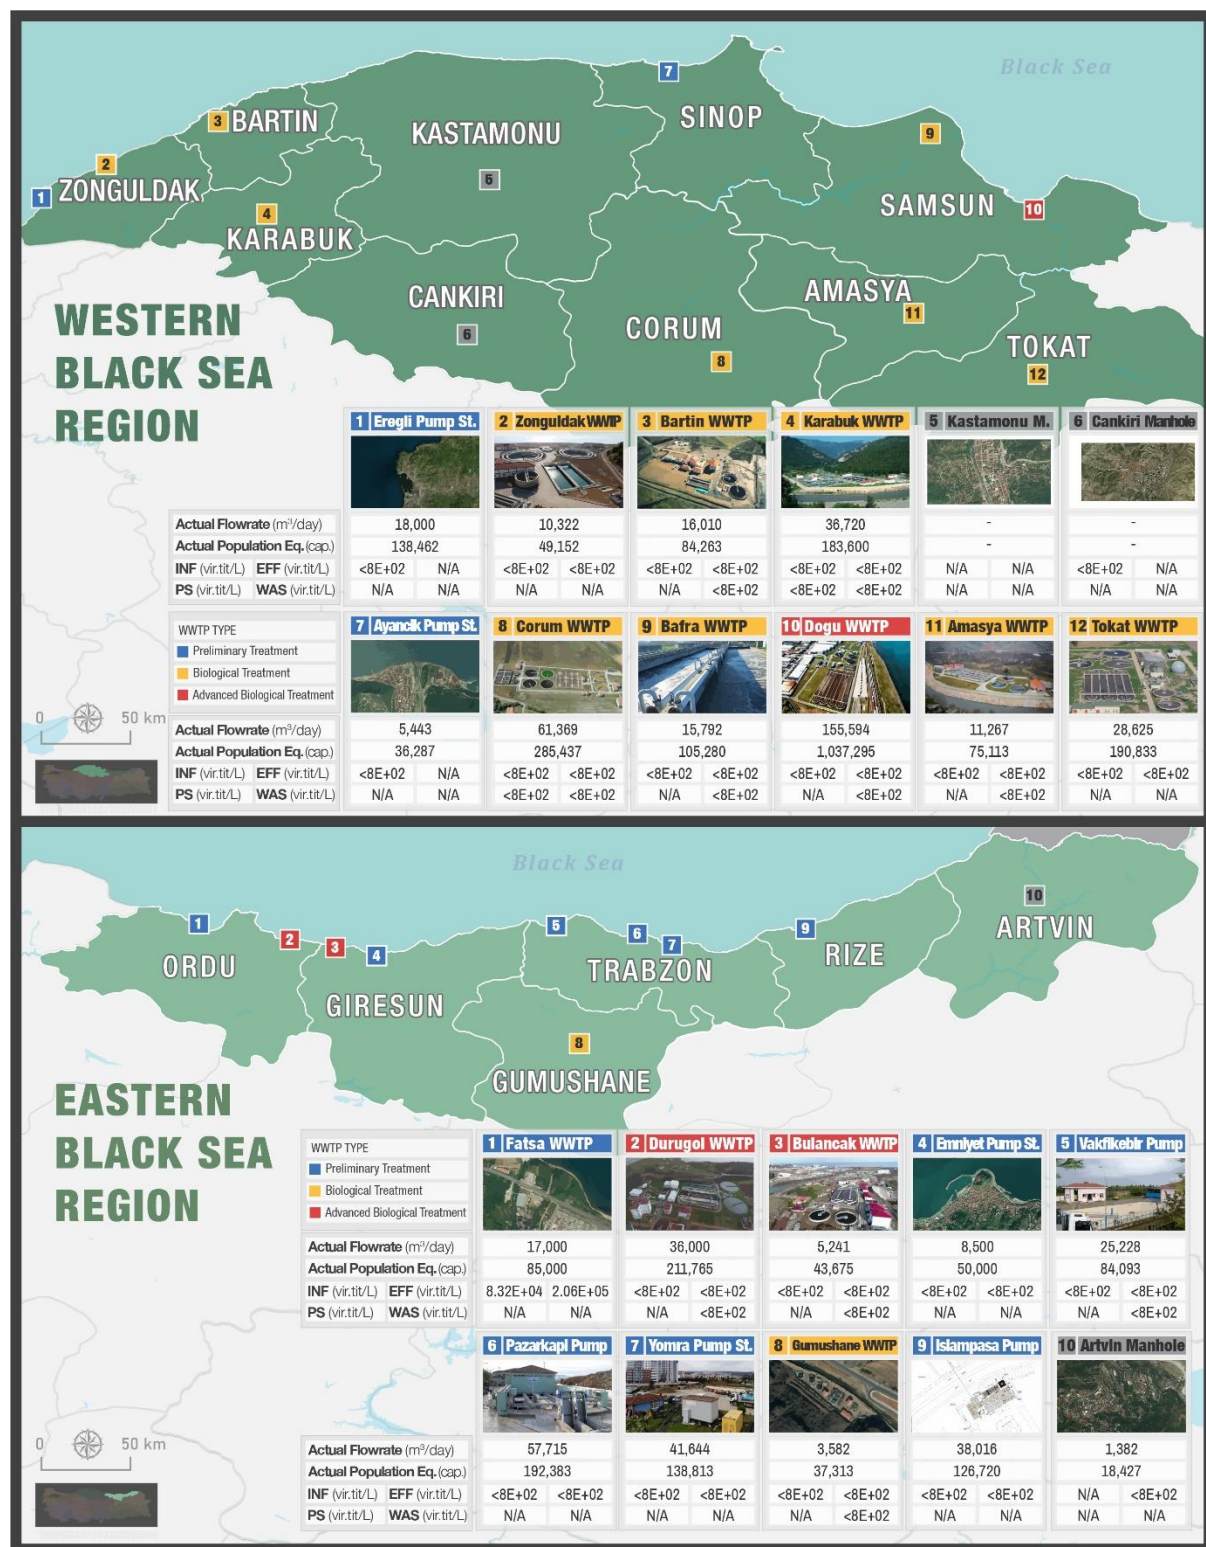

**Fig 8. SARS-CoV-2 titers in wastewater and sludges of cities located in Black Sea region**

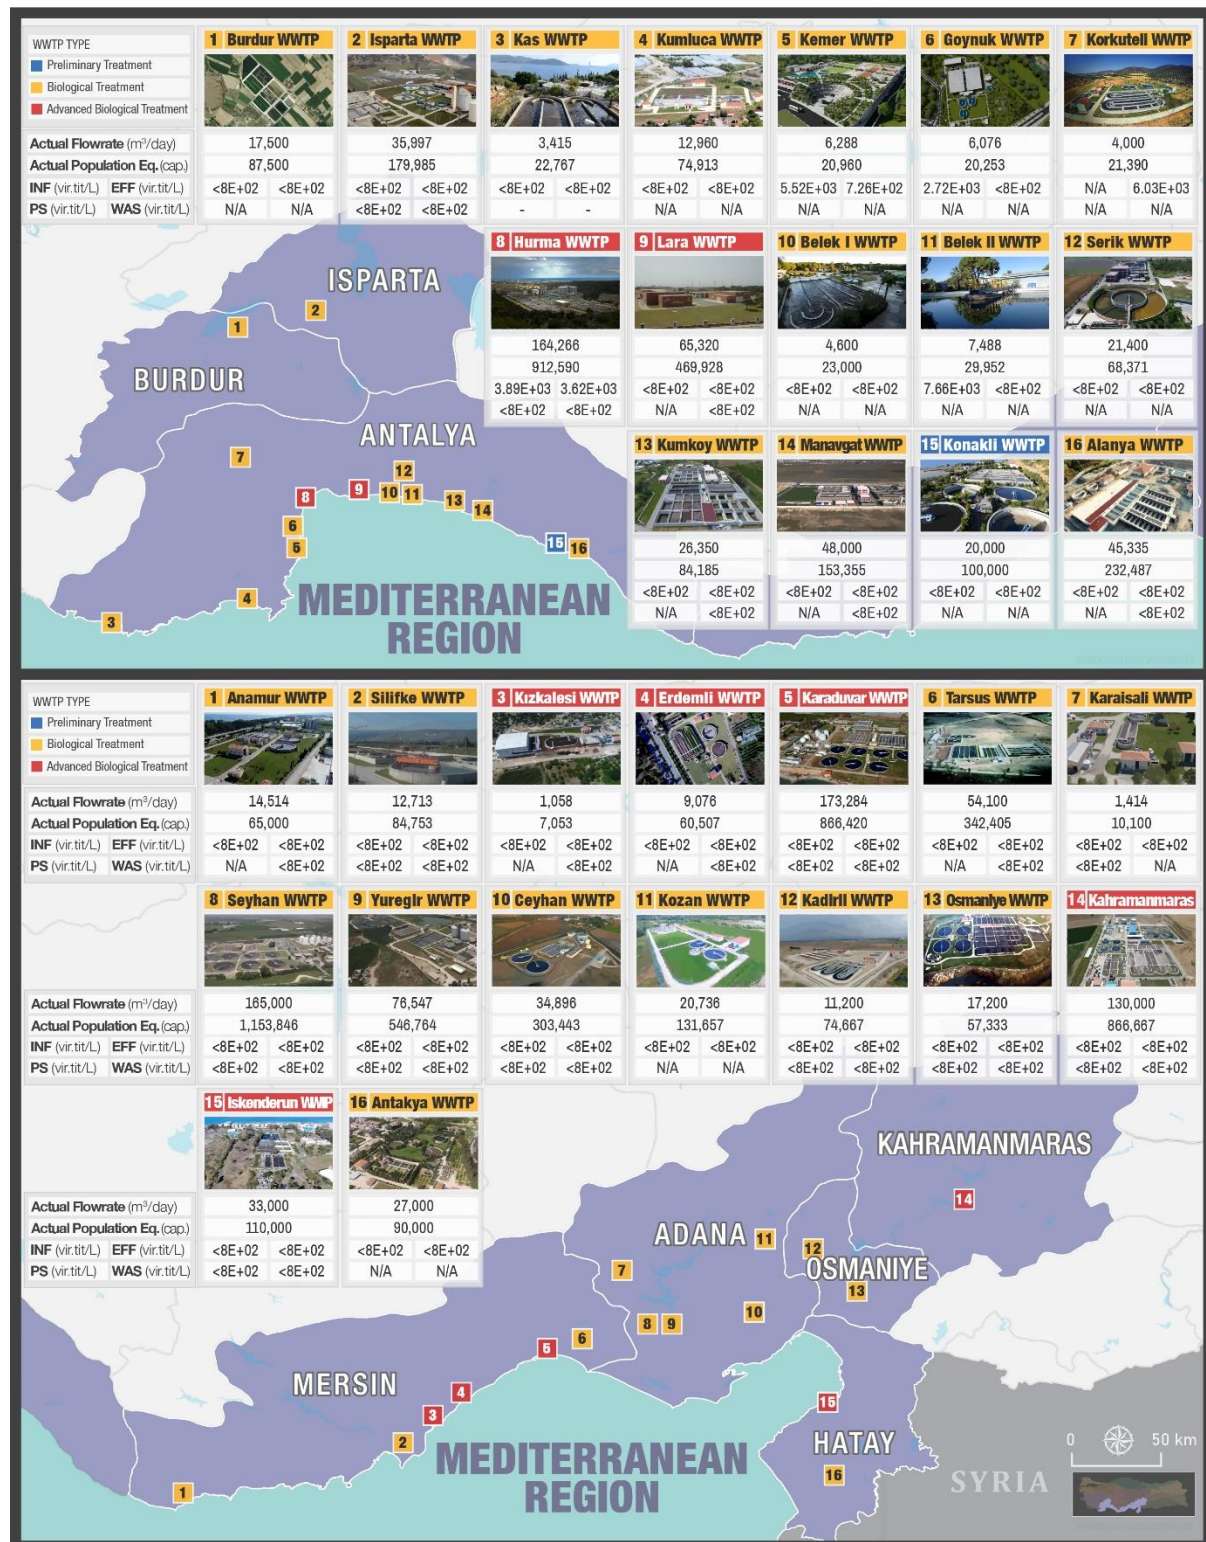

**Fig 9. SARS-CoV-2 titers in wastewater and sludges of cities located in Mediterranean region**



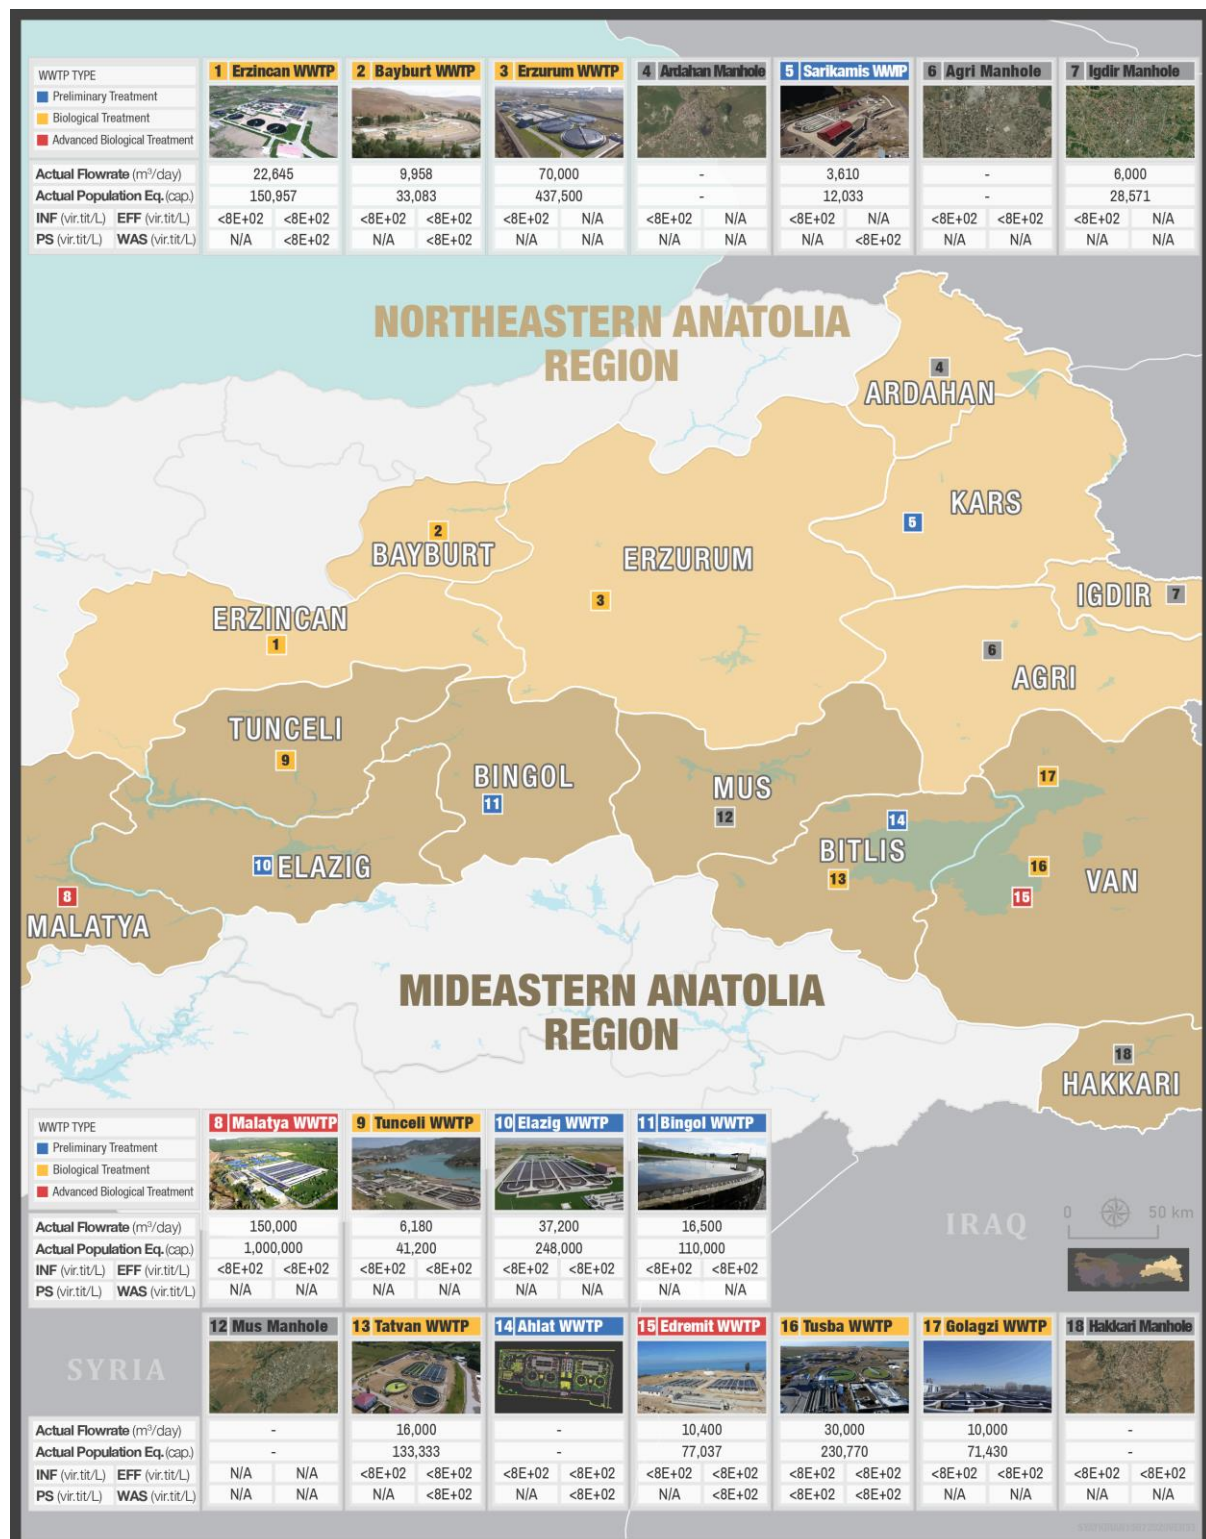

**Fig 10.** SARS-CoV-2 titers in wastewater and sludges of cities located in Eastern Anatolia region

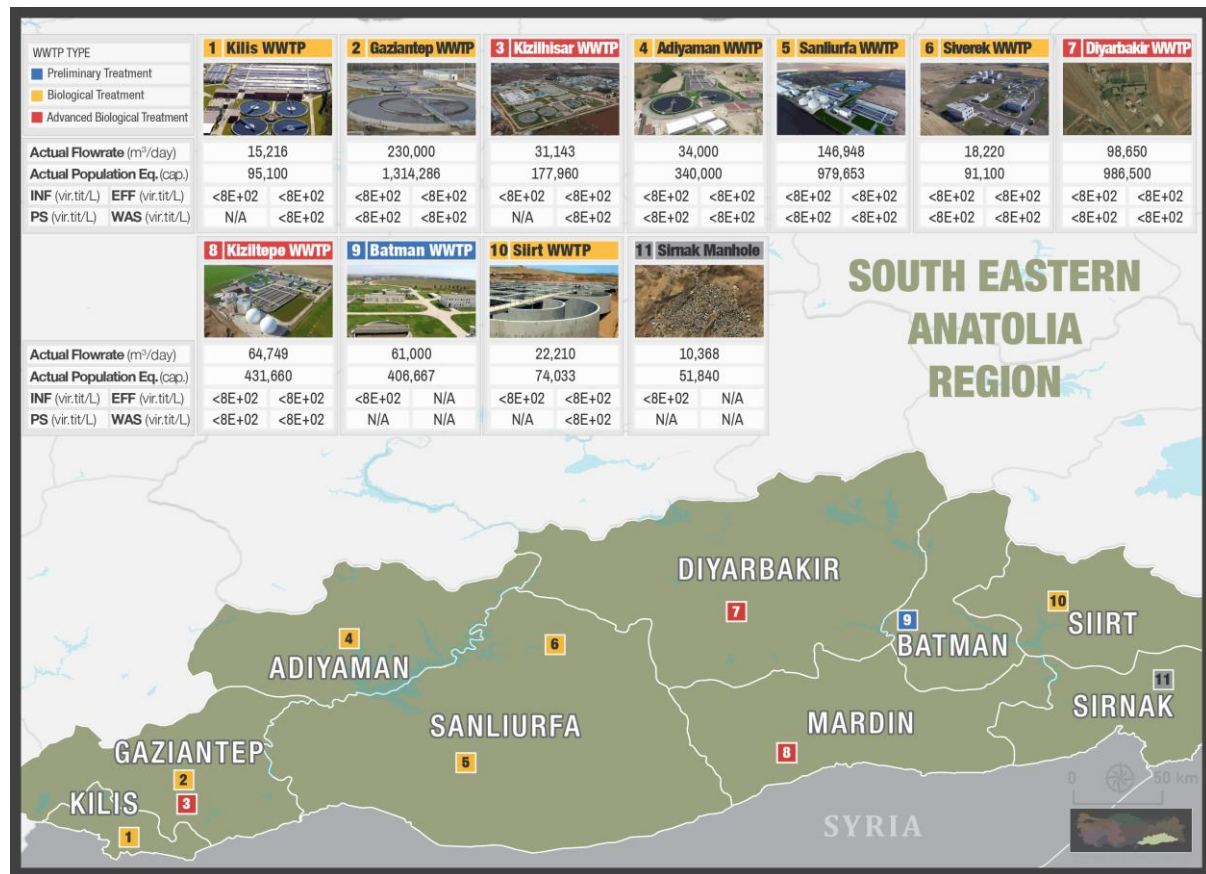

**Fig 11.** SARS-CoV-2 titers in wastewater and sludges of cities located in SouthEastern Anatolia region

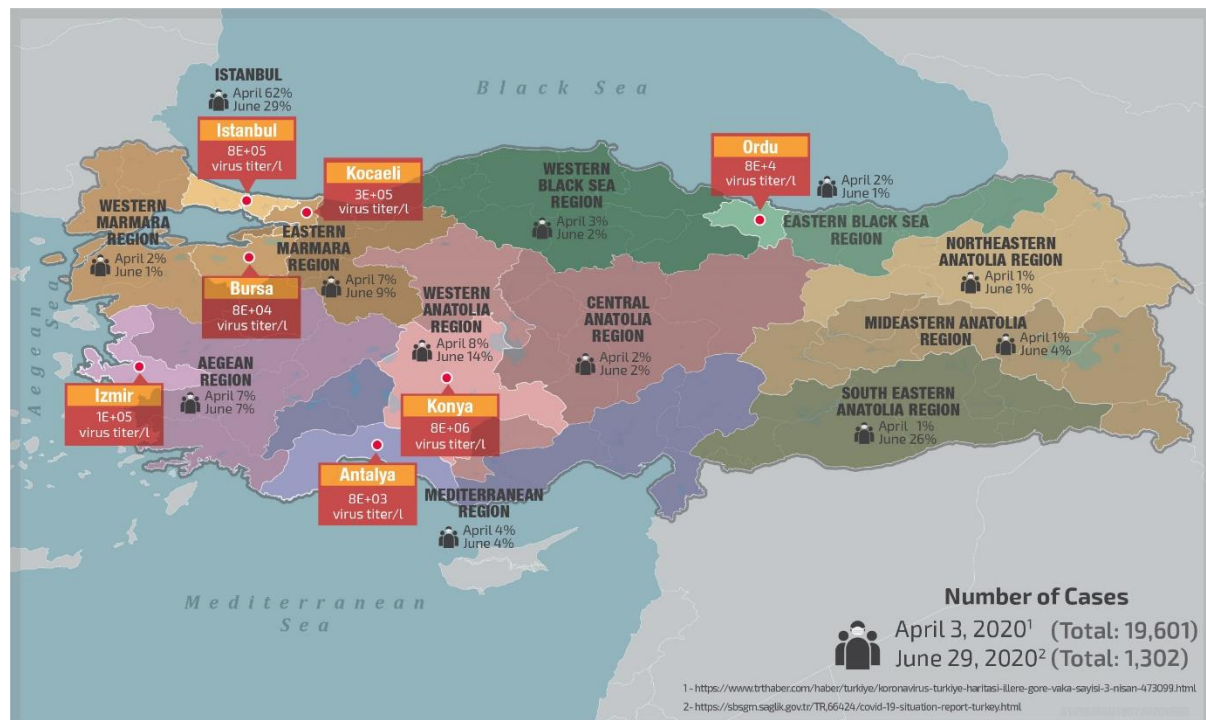

**Fig 12.** Overall results of SARS-CoV-2 surveillance in wastewater and sludges of Turkey from May 2020 to June 2020

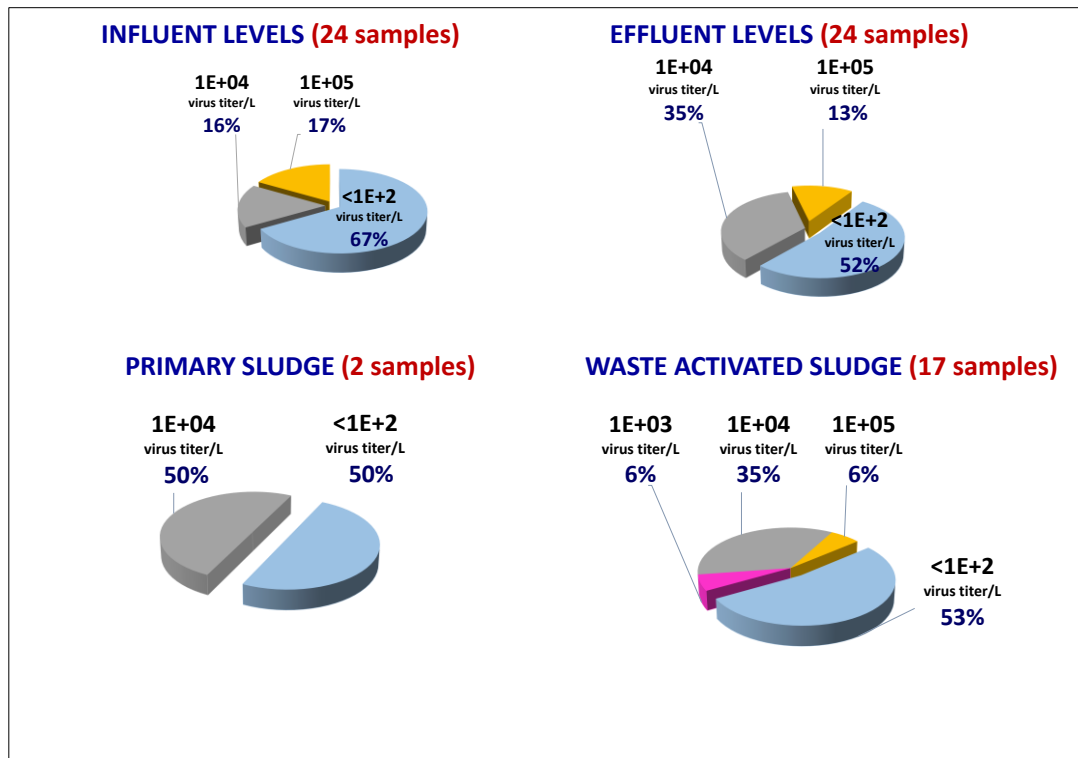

**Fig 13.** Distribution of SARS-CoV-2 titers in Istanbul influent, effluent and sludge samples from May 2020 to June 2020

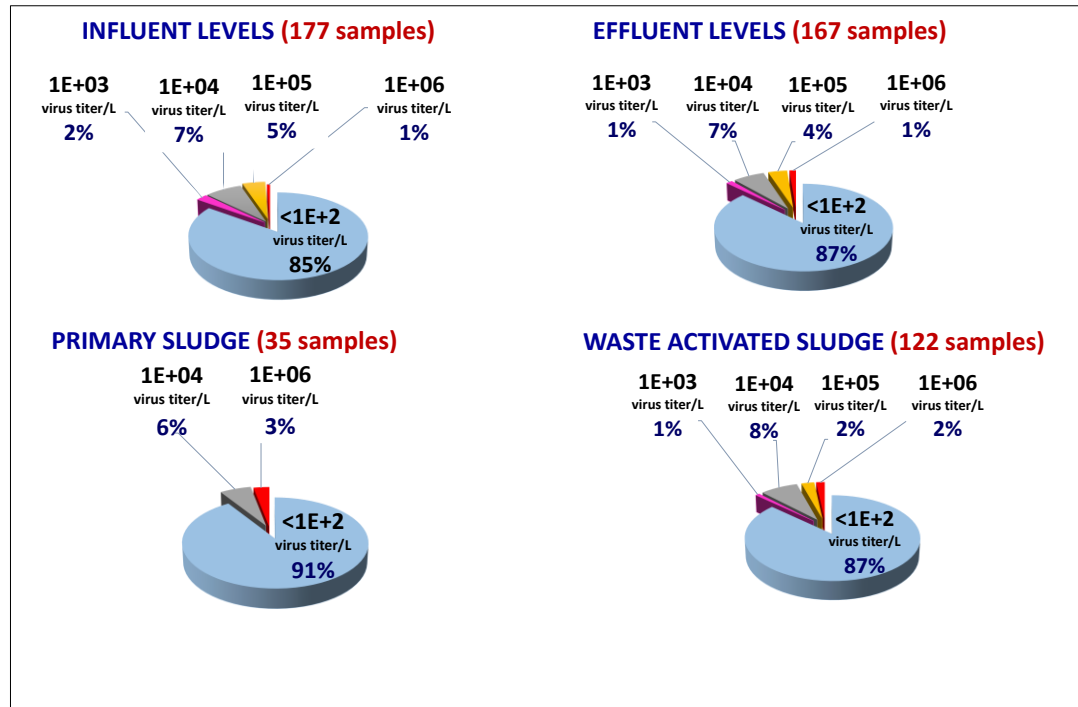

**Fig 14.** Distribution of SARS-CoV-2 titers in influent, effluent and sludge samples of 81 cities in Turkey from May 2020 to June 2020

## **4.2 SARS-CoV-2 Activity Test Results**

Influent, effluent, primary sludge and waste activated sludge samples of Istanbul, Izmir, Izmit, Bursa and Konya cities demonstrating positive results of SARS-CoV-2 were tested in order to evaluate the possible activity of virus in treatment plants. Among the 31 positive samples tested, only in 1 waste activated sludge sample of Konya WWTP the SARS-CoV-2 virus was found active.

## **4.3. Comments on Negative qPCR results**

As mentioned in Section 4.1, among the 81 cities scanned from May 2020 to June 2020, SARS-CoV-2 was only detected in 7 cities wastewater and sludge samples. All these tests were performed using qPCR primers targeting RdRp gene (Section 3.3) since initial trials with the primer targeting N1N2 were not successful to detect SARS-CoV-2. However, starting from June 2020, SARS-CoV-2 could not be detected in any city, although there were cities like Istanbul reporting significant number of cases at that time. Hence, in September 2020, it was decided to change primer targeting RdRp gene with the primer targeting N1N2 gene. Using the primer targeting N1N2 gene, we again started to monitor SARS-CoV-2 in the samples. The parallel readings conducted with primers targeting RdRp gene were still negative.

## **Ethics Statement**

The work did not involve any human subject and animal experiments.

## **Acknowledgments**

This work was financed by Republic of Turkey, Ministry of Agriculture and Forestry.

The authors wish to acknowledge the Turkish Water Institute (SUEN) for the coordination and execution of this study. We wish to express our appreciation to the Ministry's Istanbul Pendik and Samsun Veterinary Control Central Research Institute for their hard work and rapid analysis of the wastewater samples. We thank to DSI (State Hydraulic Works) for their logistic support for intercity sample transportation. We also thank to all municipalities for their cooperation and efforts to collect and preserve the sewage samples rapidly. Our special thanks to Env. Eng. Salim Yaykiran from SUEN for regional maps and Env.Eng. Sumeyye Celik from Marmara University her contribution to gather and collate up to date information about the worldwide studies on SARS-CoV-2 in wastewater.

## **Declaration of Competing Interest**

The authors declare that they have no known competing financial interests or personal relationships which have, or could be perceived to have, influenced the work reported in this article.



## References

1. Wu, Y., Guo, C., Tang, L., Hong, Z., Zhou, J., Dong, X., Yin, H., Xiao, Q., Tang, Y. and Qu, X. 2020. Prolonged presence of SARS-CoV-2 viral RNA in faecal samples. *The lancet Gastroenterology & hepatology* 5(5), 434-435.
2. Medema, G., Heijnen, L., Elsinga, G., Italiaander, R. and Brouwer, A. 2020. Presence of SARS-Coronavirus-2 RNA in Sewage and Correlation with Reported COVID-19 Prevalence in the Early Stage of the Epidemic in The Netherlands. *Environmental Science and Technology Letters* 7 (7), 511-516. DOI: 10.1021/acs.estlett.0c00357.
3. Lodder, W. and de Roda Husman, A.M. 2020. SARS-CoV-2 in wastewater: potential health risk, but also data source. *Lancet Gastroenterology and Hepatology*. doi: 10.1016/S2468-1253(20)30087-X.
4. Medema, G., Heijnen, L., Elsinga, G., Italiaander, R. and Brouwer, A. 2020. Presence of SARS-Coronavirus-2 RNA in Sewage and Correlation with Reported COVID-19 Prevalence in the Early Stage of the Epidemic in The Netherlands. *Environmental Science and Technology Letters* 7 (7), 511-516. DOI: 10.1021/acs.estlett.0c00357.
5. Nemudryi, A., Nemudraia, A., Surya, K., Wiegand, T., Buyukyoruk, M., Wilkinson, R. and Wiedenheft, B. 2020. Temporal detection and phylogenetic assessment of SARS-CoV-2 in municipal wastewater. *MedRxiv*. 2020.04.15.20066746. <https://doi.org/10.1101/2020.04.15.20066746>.
6. Green, H., Wilder, M., Middleton, F.A., Collins, M., Fenty, A., Gentile, K., Kmush, B., Zeng, T. and Larsen, D.A. 2020. Quantification of SARS-CoV-2 and cross-assembly phage (crAssphage) from wastewater to monitor coronavirus transmission within communities. <https://doi.org/10.1101/2020.05.21.20109181>
7. Wu, F., Xiao, A., Zhang, J., Moniz, K., Endo, N., Armas, F., Bonneau, R., Brown, M.A., Bushman, M., Chai, P.R., Duvallet, C., Erickson, T.B., Foppe, K., Ghaeli, N., Gu, X., Hanage, W.P., Huang, K.H., Lee, W.L., Matus, M., McElroy, K.A., Nagler, J., Rhode, S.F., Santillana, M., Tucker, J.A., Wuertz, S., Zhao, S., Thompson, J. and Alm, E.J. 2020. SARS-CoV-2 titers in wastewater foreshadow dynamics and clinical presentation of new COVID-19 cases. <https://doi.org/10.1101/2020.06.15.20117747>.
8. Curtis, K., Keeling, D., Yetka, K., Larson, A. and Gonzalez, R. 2020. Wastewater SARS-CoV-2 Concentration and Loading Variability from Grab and 24-Hour Composite Samples. <https://doi.org/10.1101/2020.07.10.20150607>.
9. Weidhaas, J., Aanderud, Z., Roper, D., Vanderslice, J., Gaddis, E., Ostermiller, J., Hoffman, K., Jamal, R., Heck, P., Zhang, Y., Torgersen, K., Laan, J.V., Lacross, N., 2020. Correlation of SARS-CoV-2 RNA in wastewater with COVID-19 disease burden in sewersheds. doi:10.21203/rs.3.rs-40452/v1

- 10.** Sherchan, S. P., Shahin, S., Ward, L.M., Tandukar, S., Aw, T.G., Schmitz, B., Ahmed, W. And Kitajima, M.2020. First detection of SARS-CoV-2 RNA in wastewater in North America: A study in Louisiana, USA, *Science of The Total Environment*, Volume 743,140621.  
<https://doi.org/10.1016/j.scitotenv.2020.140621>.
- 11.** Ahmed, W., Angel, N., Edson, J., Bibby, K., Bivins, A., O'Brien, J.W., Choi, P.M., Kitajima, M., Simpson, S.L., Li, J., Tschärke, B., Verhagen, R., Smith, W.J.M., Zaugg, J., Dierens, L., Hugenholtz, P., Thomas, K.V. and Mueller, J.F. 2020. First confirmed detection of SARS-CoV-2 in untreated wastewater in Australia: A proof of concept for the wastewater surveillance of COVID-19 in the community. *Science of the Total Environment*. 138764.  
<https://doi.org/10.1016/J.SCITOTENV.2020.138764>.
- 12.** Wurtzer, S., V. Marechal, V., Mouchel, J.M. and Moulin, L. 2020. Time course quantitative detection of SARS-CoV-2 in Parisian wastewaters correlates with COVID-19 confirmed cases, *MedRxiv*. 2020.04.12.20062679. <https://doi.org/10.1101/2020.04.12.20062679>.
- 13.** Wurtzer, S., Marechal, V., Mouchel, J.M., Maday, Y., Teyssou, R., Richard, E., Almayrac, J.L. and Moulin, L. 2020. Evaluation of lockdown impact on SARS-CoV-2 dynamics through viral genome quantification in Paris wastewaters  
<https://doi.org/10.1101/2020.04.12.20062679>
- 14.** Trottier, J., Darques, R., Mouheb, N.A., Partiot, E., Bakhache, W., Deffieu, M.S. and Gaudin, R. 2020. Post-lockdown detection of SARS-CoV-2 RNA in the wastewater of Montpellier, France.  
<https://doi.org/10.1101/2020.07.08.20148882>
- 15.** Wang, J., Feng, H., Zhang, S., Ni, Z., Ni, L., Chen, Y., Zhuo, L., Zhong, Z. and Qu, T. 2020. SARS-CoV-2 RNA detection of hospital isolation wards hygiene monitoring during the Coronavirus Disease 2019 outbreak in a Chinese hospital. *International Journal of Infectious Diseases*. 94:103-106. doi: 10.1016/j.ijid.2020.04.024.
- 16.** Randazzo, W., Truchado, P., Ferrando, E.C., Simon, P., Allende, A. and Sanchez, G. 2020. SARS-CoV-2 RNA titers in wastewater anticipated COVID-19 occurrence in a low prevalence area, *MedRxiv*. 2020.04.22.20075200. <https://doi.org/10.1101/2020.04.22.20075200>.
- 17.** Randazzo, W., Ferrando, E.C., Sanjuan, R., Calap, P.D. and Sanchez, G. 2020. Metropolitan Wastewater Analysis for COVID-19 Epidemiological Surveillance.  
<https://doi.org/10.1101/2020.04.23.20076679>.
- 18.** Mera, F., Río, R., Fuente, J., Sancho, M. Hervas, D., Moreno, I., Dominguez, M., Domínguez, L., Gortázar, C. 2020.COVID-19 in a Rural Community: Outbreak Dynamics, Contact Tracing and Environmental RNA. *Preprints 2020*, 2020050450  
<https://www.preprints.org/manuscript/202005.0450/v1>
- 19.** Miró, G. C., Estrada, E. A., Guix, S., Paraira, M., Galofré, B., Sánchez, G., Pintó, R. and Bosch, A. 2020. Sentinel surveillance of SARS-CoV-2 in wastewater anticipates the occurrence of COVID-19 cases.

<https://doi.org/10.1101/2020.06.13.20129627>

**20.** Vallejo, J.A., Feal, S.R., Perez, K.C., Oriona, A.L., Tarrio, J., Reif, R., Ladra, S., Janeiro, B.K.R., Nasser, M., Cid, A., Veiga, M.C., Acevedo, A., Lamora, C., Bou, G., Cao, R. and Poza, M. 2020. Highly predictive regression model of active cases of COVID-19 in a population by screening wastewater viral load.

<https://doi.org/10.1101/2020.07.02.20144865>.

**21.** La Rosa, G., Iaconelli, M., Mancini, P., Ferraro, G.B., Veneri, C., Bonadonna, L. Lucentini, L and Suffredini E. 2020. First Detection Of Sars-Cov-2 In Untreated Wastewaters In Italy. MedRxiv 2020.04.25.20079830. <https://doi.org/10.1101/2020.04.25.20079830>.

**22.** Rimoldi, S.G., Stefani, F., Gigantiello, A., Polesello, S., Comandatore, F., Mileto, D., Maresca, M., Longobardi, C., Mancon, A., Romeri, F., Pagani, C., Moja, L., Gismondo, M.R and Salerno, F. 2020. Presence and vitality of SARS-CoV-2 virus in wastewaters and rivers.

<https://doi.org/10.1101/2020.05.01.20086009>

**23.** La Rosa, G., Mancini, P., Ferraro, G.B., Veneri, C., Iaconelli, M., Bonadonna, L., Lucentini, L. and Suffredini, E. 2020. SARS-CoV-2 has been circulating in northern Italy since December 2019: evidence from environmental monitoring.

<https://doi.org/10.1101/2020.06.25.20140061>.

**24.** Or, I.B., Yaniv, K., Shagan, M., Ozer, E., Erster, O., Mendelson, E., Mannasse, B., Shirazi, R., Winter, E.K., Nir, O., Ali, H.A., Ronen, Z., Rinott, E., Lewis, Y. E., Friedler E. F., Paitan, Y., Bitkover, E., Berchenko, Y. and Kushmaro, A. 2020. Regressing SARS-CoV-2 sewage measurements onto COVID-19 burden in the population: a proof-of-concept for quantitative environmental surveillance. medRxiv 2020.04.26.20073569. <https://doi.org/10.1101/2020.04.26.20073569>.

**25.** Alpaslan Kocamemi, B., Kurt, H., Hacıoglu, S., Yaralı, C., Saatci, A.M. and Pakdemirli, B. 2020. First Data-Set on SARS-CoV-2 Detection for Istanbul Wastewaters in Turkey. MedRxiv. <https://doi.org/10.1101/2020.05.03.20089417>.

**26.** Döhla, M., Wilbring, G., Schulte, B., Kümmerer, B.M., Diegmann, C., Sib, E., Richter, E., Haag, A., Engelhart, S., Eis-Hübinger, A.M., Exner, M., Streeck, H. and Schmuthausen, R.M. 2020. SARS-CoV-2 in environmental samples of quarantined households.

<https://doi.org/10.1101/2020.05.28.20114041>.

**27.** Hata, A., Honda, R., Hara-Yamamura, H. and Meuchi, Y. 2020. Detection of SARS-CoV-2 in wastewater in Japan by multiple molecular assays-implication for wastewater-based epidemiology (WBE).

<https://doi.org/10.1101/2020.06.09.20126417>.

**28.** Haramoto, F., Malla, B., Thakali, O. and Kitajima, M. 2020. First environmental surveillance for the presence of SARS-CoV-2 RNA in wastewater and river water in Japan. Science of The Total Environment. Volume 737. 40405.

<https://doi.org/10.1016/j.scitotenv.2020.140405>

- 29.** Kumar, M., Patel, A.K, Shah, A. V., Raval, J., Rajpara, N., Joshi, M. and Joshi, C.G. 2020. First proof of the capability of wastewater surveillance for COVID-19 in India through detection of genetic material of SARS-CoV-2. *Science of The Total Environment*, Volume 746, 141326.  
<https://doi.org/10.1016/j.scitotenv.2020.141326>.
- 30.** Arora, S., Nag, A., Sethi, J., J Rajvanshi, J., Saxena, S., Shrivastava, S. K. and Gupta A.B. 2020. Sewage surveillance for the presence of SARS-CoV-2 genome as a useful wastewater-based epidemiology (WBE) tracking tool in India.  
<https://doi.org/10.1101/2020.06.18.20135277>.
- 31.** Sharif, S. Ikram, A., Khurshid, A., Salman, M., Mehmood, N., Arshad, Y., Ahmad, J., Angez, M., Alam, M.M., Rehman, L., Mujtaba, G., Hussain, J., Ali, J., Akthar, R., Malik, M. W., Baig, Z. I., Rana, M. S., Usman, M., Ali, M. Q., Ahad, A., Badar, N., Umair, M., Tamim, S., Ashraf, A., Tahir F. and Ali, N. 2020. Detection of SARS-Coronavirus-2 in wastewater, using the existing environmental surveillance network: An epidemiological gateway to an early warning for COVID-19 in communities.  
<https://doi.org/10.1101/2020.06.03.20121426>.
- 32.** Fongaro, G., Stoco, P.H., Souza, D.S.M., Grisard, E.C., Magri, M.E., Rogovski, P., Schorner, M.A., Barazzetti, F.H., Christoff, A.P., Valter de Oliveira, L.P., Bazzo, M.L., Wagner, G., Hernandez, M. and Lazaro, D.R. 2020. SARS-CoV-2 in human sewage in Santa Catalina, Brazil, November 2019.  
<https://doi.org/10.1101/2020.06.26.20140731>.
- 33.** Prado, T., Fumian, T.M., Mannarino, C.F., Maranhão, A. G., Siqueira, M.M., and Miagostovich, M. P. 2020. Preliminary results of SARS-CoV-2 detection in sewerage system in Niterói municipality. Rio de Janeiro, Brazil. *Memórias do Instituto Oswaldo Cruz*, 115, e200196. Epub July 27.
- 34.** Ampuero, M., Valenzuela, S., Echeverria, F.V., Rifo, R.S., Barriga, G.P., Chnaiderman, J., Rojas, C., Leiva, S.G., Diez, B. and Gaggero, A. 2020. SARS-CoV-2 Detection in Sewage in Santiago, Chile - Preliminary results.  
<https://doi.org/10.1101/2020.07.02.20145177>.
- 35.** Jorgensen, A.U., Gamst, J., Hansen, L.V., Knudsen, I.I.H. and Jensen, S.K.S. 2020. Eurofins Covid-19 Sentinel TM Wastewater Test Provide Early Warning of a potential COVID-19 outbreak.  
<https://doi.org/10.1101/2020.07.10.20150573>.  
<https://doi.org/10.1590/0074-02760200196>
- 36.** Latorre, L.G., Ballesteros, I., Granda, I.V., Granda, M.G., Paspuel, B.F. and Touma, B.R. 2020. SARS-CoV-2 in river water: Implications in low sanitation countries, *Science of The Total Environment*, Volume 743, 140832.  
<https://doi.org/10.1016/j.scitotenv.2020.140832>.



- 37.** Jafferli, M.H., Khatami, K., Atasoy, M., Birgersson, M., Williams, C. and Cetecioglu, Z. 2020. Benchmarking virus concentration methods for quantification of SARS-CoV-2 in raw wastewater. *Science of the Total Environment*. <https://doi.org/10.1016/j.scitotenv.2020.142939>
- 38.** Alpaslan Kocamemi, B., Kurt, H., Sait, A., Sarac, F., Saatci, A.M. and Pakdemirli, B. 2020b. SARS-CoV-2 Detection in Istanbul Wastewater Treatment Plant Sludges. *medRxiv*, 2020.2005.2012.20099358.
- 39.** Peccia, J., Zulli, A., Brackney, D.E., Grubaugh, N.D, Kaplan, E.H., Massana, A.C., Ko, A.I., Malik, A.A., Wang, D., Wang, M., Warren, J.L., Weinberger, D.M. and Omer, S.B. 2020. SARS-CoV-2 RNA concentrations in primary municipal sewage sludge as a leading indicator of COVID-19 outbreak dynamics. <https://doi.org/10.1101/2020.05.19.20105999>
- 40.** Balboa, S., Iglesias, M.M., Rodríguez, S., Lamas, L.M Vasallo, F.J., Regueiro, B. and Lema, J.L. 2020. The fate of SARS-CoV-2 in wastewater treatment plants points out the sludge line as a suitable spot for incidence monitoring. <https://doi.org/10.1101/2020.05.25.20112706>
- 41.** COVID 19 WBE Publications. Access date 10.19.2020. Retrieved from <https://www.google.com/maps/d/viewer?mid=liZCnJzOJ9ovo-tUgPl4hK0478IMrIFp4&ll=37.583778844204154%2C136.50354952742353&z=9>
